# Supplementary material for: Tiered approach for the identification of Mal d 1 reduced, well tolerated apple genotypes
Source: PubMed Central journal article supplement (PMC7272412; doi:10.1038/s41598-020-66051-4), 2020-06-04
Supplement: 41598_2020_66051_MOESM3_ESM.pdf [file 41598_2020_66051_MOESM3_ESM.pdf]

# Supplementary Information

## **Tiered approach for the identification of Mal d 1 reduced, well tolerated apple genotypes**

Emilia Romer<sup>1</sup>, Soraya Chebib<sup>1</sup>, Karl-Christian Bergmann<sup>2</sup>, Katrin Plate<sup>3</sup>, Sylvia Becker<sup>4</sup>,  
Christina Ludwig<sup>5</sup>, Chen Meng<sup>5</sup>, Thilo Fischer<sup>6</sup>, Werner Dierend<sup>3</sup>, Wilfried Schwab<sup>1</sup>

<sup>1</sup>Biotechnology of Natural Products, Technical University Munich, Liesel-Beckmann-Str. 1, 85354 Freising, Germany

<sup>2</sup>Comprehensive Allergy Center Charité, Charité Hospital Berlin, Charitéplatz 1, 10117 Berlin Germany

<sup>3</sup>Faculty of Agricultural Science and Landscape Architecture, Fruit Science, University of Applied Sciences Osnabrück, Oldenburger Landstr. 24, 49090 Osnabrück, Germany

<sup>4</sup>European Center of Allergy Research Foundation, Robert-Koch-Platz 7, 10117 Berlin, Germany

<sup>5</sup>Bavarian Center for Biomolecular Mass Spectrometry (BayBioMS), Technical University Munich, Gregor-Mendel-Straße 4, 85354 Freising, Germany

<sup>6</sup>GENE, Lise-Meitner-Str. 30, 85354 Freising, Germany

**Supplementary material S3. Western blot analysis**

**Supplementary material S4. Standard curve and raw data example**

## Supplementary material S3.

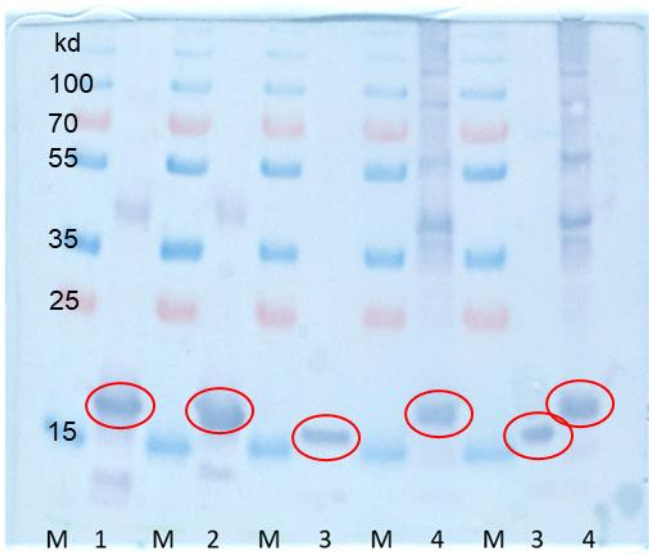

M = Proteinmarker

1 = Mal d 1  
2 = Pru d 1  
3 = Bet v 1  
4 = Fra a 1

} 3.5 µg / line

1st antibody: polyclonal rabbit-anti- Mal d 1  
c = 2.5 µg/mL

2nd antibody: goat-anti-rabbit-AP

**Western blot analysis** of Mal d 1.02 (Q8L6K9), Pru d 1 (B5KVN9), Bet v 1 a (P15494), and Fra 1.02 (QET923) using the antibody raised against Mal d 1. Experimental details [35]. Prestained marker proteins were used.

# Supplementary material S4.

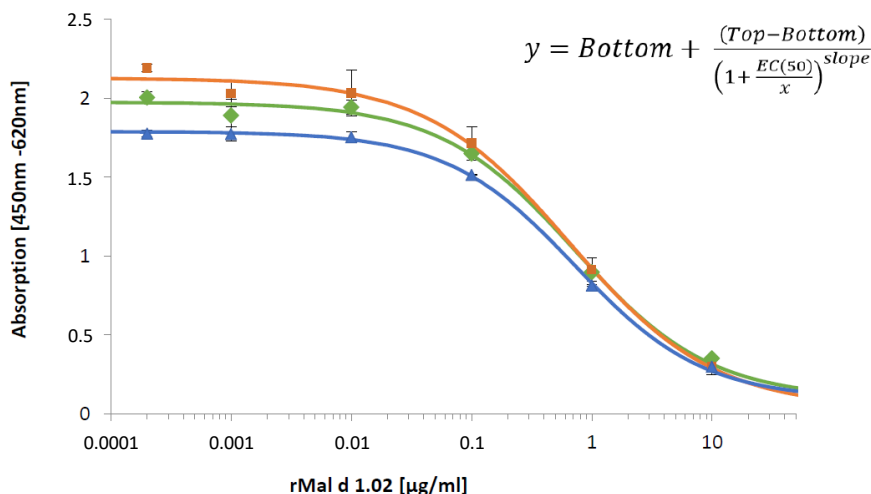

**Standard curves of rMal d 1** calculated with the 4-parameter fit. On each ELISA-plate, a standard curve of serial diluted rMal d 1.02 in triplicates were performed to adjust inter-assay variations.

**ELISA - Raw data of three exemplary apple genotypes with calculated Mal d 1 concentrations.** Samples were used undiluted and diluted 1:2 in PBS-buffer to fit the linear range of the standard curve. For more details, see Materials and Methods. The prefix p indicates the genotypes of the crossbreeding population. Each line represents one measurement.

| Sample    | Raw data (OD <sub>450nm</sub> ) | Raw data (OD <sub>620nm</sub> ) | Absorption (blank corrected) (450 nm – 620 nm) | 4-Parameter fit incl. dilution factor (µg/mL) = concentration in extract | Concentration Mal d 1 (µg/g FW) = concentration in apples |
|-----------|---------------------------------|---------------------------------|------------------------------------------------|--------------------------------------------------------------------------|-----------------------------------------------------------|
| blank     | 0.1                             | 0.029                           |                                                |                                                                          |                                                           |
| blank     | 0.084                           | 0.03                            |                                                |                                                                          |                                                           |
| p 124     | 1.068                           | 0.03                            | 0.973                                          | 1.254                                                                    | 3.599                                                     |
| p 124     | 1.103                           | 0.029                           | 1.009                                          | 1.139                                                                    | 3.269                                                     |
| p 124     | 0.988                           | 0.03                            | 0.893                                          | 1.557                                                                    | 4.469                                                     |
| p 124     | 1.07                            | 0.031                           | 0.974                                          | 1.249                                                                    | 3.657                                                     |
| p 124     | 0.977                           | 0.029                           | 0.882                                          | 1.603                                                                    | 4.693                                                     |
| p 124     | 1.074                           | 0.029                           | 0.98                                           | 1.231                                                                    | 3.605                                                     |
| p 124 1:2 | 1.376                           | 0.029                           | 1.281                                          | 1.073                                                                    | 3.080                                                     |
| p 124 1:2 | 1.209                           | 0.029                           | 1.114                                          | 1.713                                                                    | 4.917                                                     |
| p 124 1:2 | 1.233                           | 0.029                           | 1.139                                          | 1.602                                                                    | 4.599                                                     |
| p 124 1:2 | 1.293                           | 0.03                            | 1.198                                          | 1.361                                                                    | 3.985                                                     |
| p 124 1:2 | 1.225                           | 0.03                            | 1.13                                           | 1.639                                                                    | 4.799                                                     |
| p 124 1:2 | 1.313                           | 0.029                           | 1.219                                          | 1.282                                                                    | 3.754                                                     |
| blank     | 0.069                           | 0.03                            |                                                |                                                                          |                                                           |
| blank     | 0.064                           | 0.029                           |                                                |                                                                          |                                                           |
| p 6       | 1.798                           | 0.03                            | 1.731                                          | 0.124                                                                    | 0.370                                                     |
| p 6       | 1.922                           | 0.029                           | 1.856                                          | 0.044                                                                    | 0.131                                                     |
| p 6       | 1.832                           | 0.034                           | 1.761                                          | 0.102                                                                    | 0.304                                                     |
| p 6       | 1.794                           | 0.03                            | 1.727                                          | 0.127                                                                    | 0.381                                                     |
| p 6       | 1.839                           | 0.03                            | 1.772                                          | 0.095                                                                    | 0.285                                                     |
| p 6       | 1.777                           | 0.029                           | 1.711                                          | 0.14                                                                     | 0.420                                                     |
| p 6 1:2   | 1.95                            | 0.029                           | 1.883                                          | 0.062                                                                    | 0.185                                                     |
| p 6 1:2   | 1.936                           | 0.029                           | 1.87                                           | 0.075                                                                    | 0.224                                                     |
| p 6 1:2   | 1.9                             | 0.03                            | 1.833                                          | 0.114                                                                    | 0.340                                                     |
| p 6 1:2   | 1.931                           | 0.031                           | 1.863                                          | 0.082                                                                    | 0.246                                                     |
| p 6 1:2   | 1.938                           | 0.031                           | 1.87                                           | 0.075                                                                    | 0.225                                                     |
| p 6 1:2   | 1.944                           | 0.029                           | 1.878                                          | 0.067                                                                    | 0.201                                                     |
| blank     | 0.102                           | 0.032                           |                                                |                                                                          |                                                           |
| blank     | 0.099                           | 0.029                           |                                                |                                                                          |                                                           |
| p 31      | 0.763                           | 0.029                           | 0.663                                          | 4.231                                                                    | 12.574                                                    |
| p 31      | 0.82                            | 0.029                           | 0.721                                          | 3.544                                                                    | 10.532                                                    |
| p 31      | 0.712                           | 0.029                           | 0.613                                          | 4.977                                                                    | 14.790                                                    |
| p 31      | 0.71                            | 0.03                            | 0.609                                          | 5.038                                                                    | 14.741                                                    |
| p 31      | 0.76                            | 0.029                           | 0.661                                          | 4.266                                                                    | 12.482                                                    |
| p 31      | 0.737                           | 0.029                           | 0.638                                          | 4.584                                                                    | 13.413                                                    |
| p 31 1:2  | 0.958                           | 0.03                            | 0.859                                          | 4.778                                                                    | 14.199                                                    |
| p 31 1:2  | 1.061                           | 0.029                           | 0.962                                          | 3.613                                                                    | 10.737                                                    |
| p 31 1:2  | 1.031                           | 0.031                           | 0.93                                           | 3.932                                                                    | 11.685                                                    |
| p 31 1:2  | 0.889                           | 0.03                            | 0.789                                          | 5.809                                                                    | 16.997                                                    |
| p 31 1:2  | 0.999                           | 0.029                           | 0.9                                            | 4.272                                                                    | 12.500                                                    |
| p 31 1:2  | 0.933                           | 0.03                            | 0.834                                          | 5.122                                                                    | 14.987                                                    |
